# Supplementary material
Source: publisher site journal article supplement (https://www.spandidos-publications.com/5233/downloadSupplementary)
Supplement: Supplementary file 1 [file downloadSupplementary]

## Sheet: Table SII
Table SII. Comparison of peak area values of UMOD peptides between different age groups.
	P-valuesa
Peptides	Control age groups (40-50 vs. 51-60 vs. 61-70)	BPH age groups (45-60 vs. 61-70 vs. 71-80)	PCa age groups (51-60 vs. 61-70 vs. 71-80 vs. >80)
UMOD-P1	0.1465	0.1521	0.3267
UMOD-P2	0.1302	0.2125	0.3569
UMOD-P3	0.1678	0.2633	0.2945
UMOD-P4	0.3035	0.0542	0.2522
UMOD-P5	0.2763	0.1968	0.1647
aOne-way ANOVA or Kruskal-#Wallis tests were used depending on the normality of the data.
